# Supplementary material for: Effect of spectacle lenses with aspherical lenslets on choroidal thickness in myopic children: a 2-year randomised clinical trial
Source: PubMed Central journal article supplement — Br J Ophthalmol. 2022 Sep 27;107(12):1806–11. doi: 10.1136/bjo-2022-321815 (PMC10715521; doi:10.1136/bjo-2022-321815), 2022-09-27
Supplement: bjo-2022-321815supp001.pdf [file bjo-2022-321815supp001.pdf]

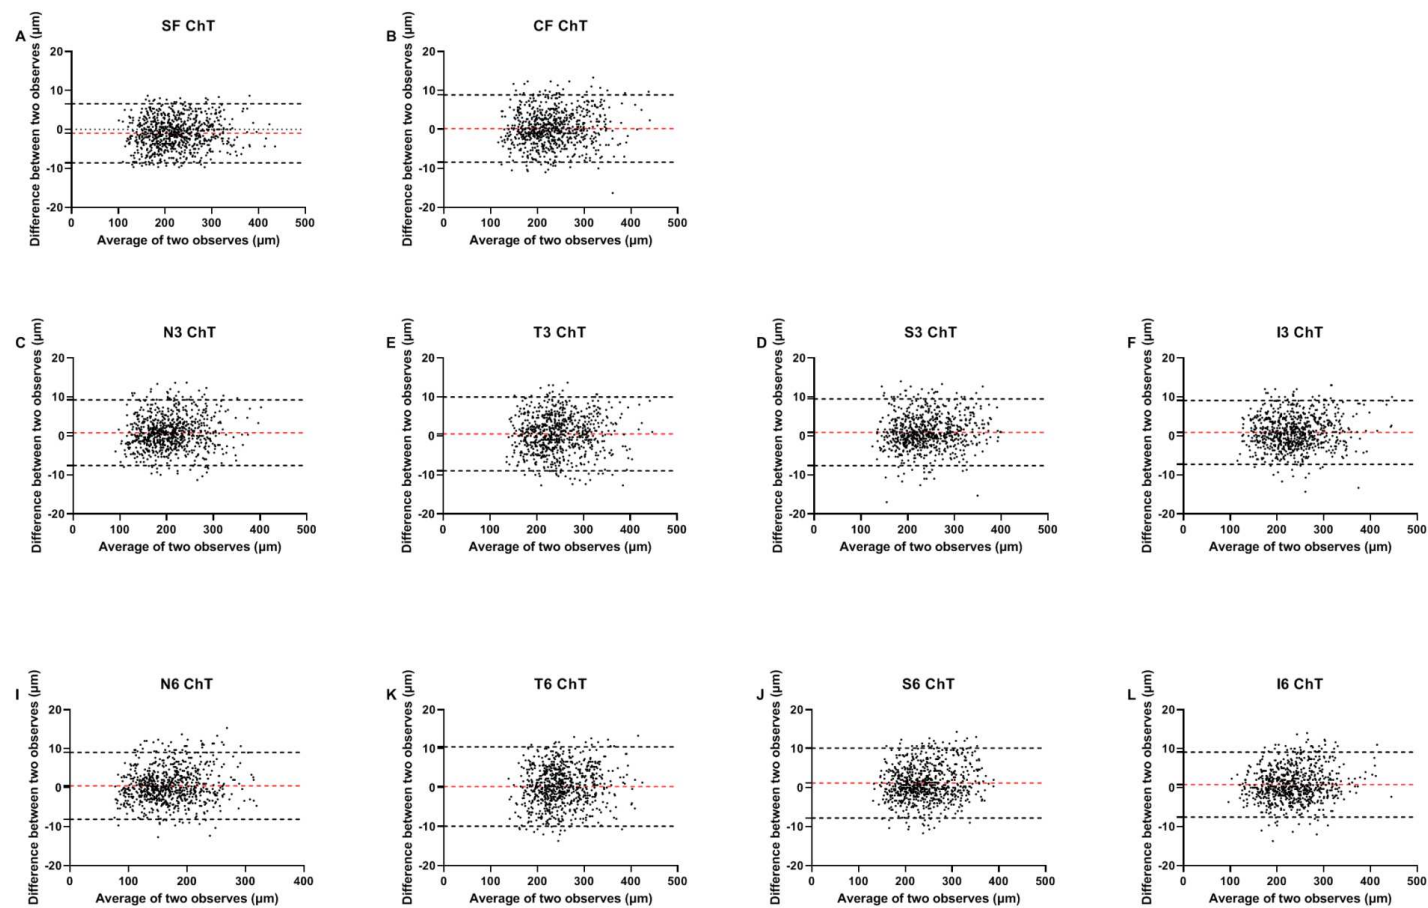

Figure 1. The repeatability of the ChT measurements of all visits in different regions between two observes. ChT, choroid thickness; SF, subfoveal; CF, central foveal; N3, 3 mm nasal region; S3, 3 mm superior region; T3, 3 mm temporal region; I3, 3 mm inferior region; N6, 6 mm nasal region; S6, 6 mm superior region; T6, 6 mm temporal region; I6, 6 mm inferior region.
